# Supplementary material
Source: publisher site journal article supplement (https://www.spandidos-publications.com/3023/downloadSupplementary)

Figure S1. Transfection efficiency of miR-5580-3p mimic in SCC-4 and Cal-27 cell lines. \*\*P<0.01 vs. NC. NC, negative control transfection; mimic, miR-5580-3p mimic transfection; miR-5580-3p, microRNA-5580-3p; LAMC2, laminin subunit  $\gamma$ 2.

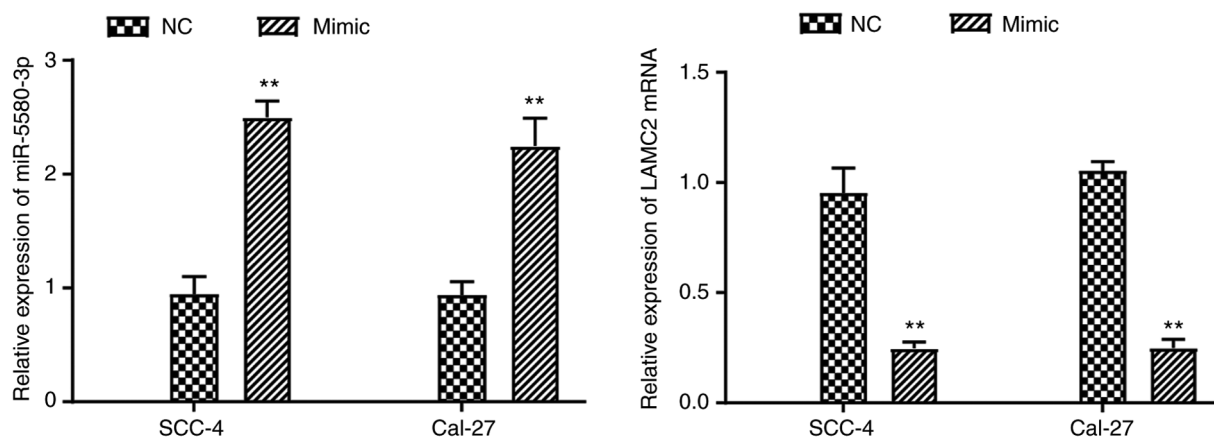

Supplement: Supplementary file 1 [file downloadSupplementary]
